# Supplementary material for: Slowdown of Shirase Glacier, East Antarctica, caused by strengthening alongshore winds
Source: Copernicus journal article supplement (doi:10.5194/tc-17-445-2023), 2023-02-01
Supplement: Supplementary file 1 [file SupplementaryInformation_TC_2.pdf › supplement/SupplementaryInformation_TC_2.pdf]

## *Supplementary Information*

### **Slowdown of Shirase Glacier caused by strengthening alongshore winds**

B.W.J. Miles\*, C.R. Stokes, A. Jenkins, J.R. Jordan, S.S.R. Jamieson, G. H. Gudmundsson

\*Correspondence to [Bertie.Miles@ed.ac.uk](mailto:Bertie.Miles@ed.ac.uk)

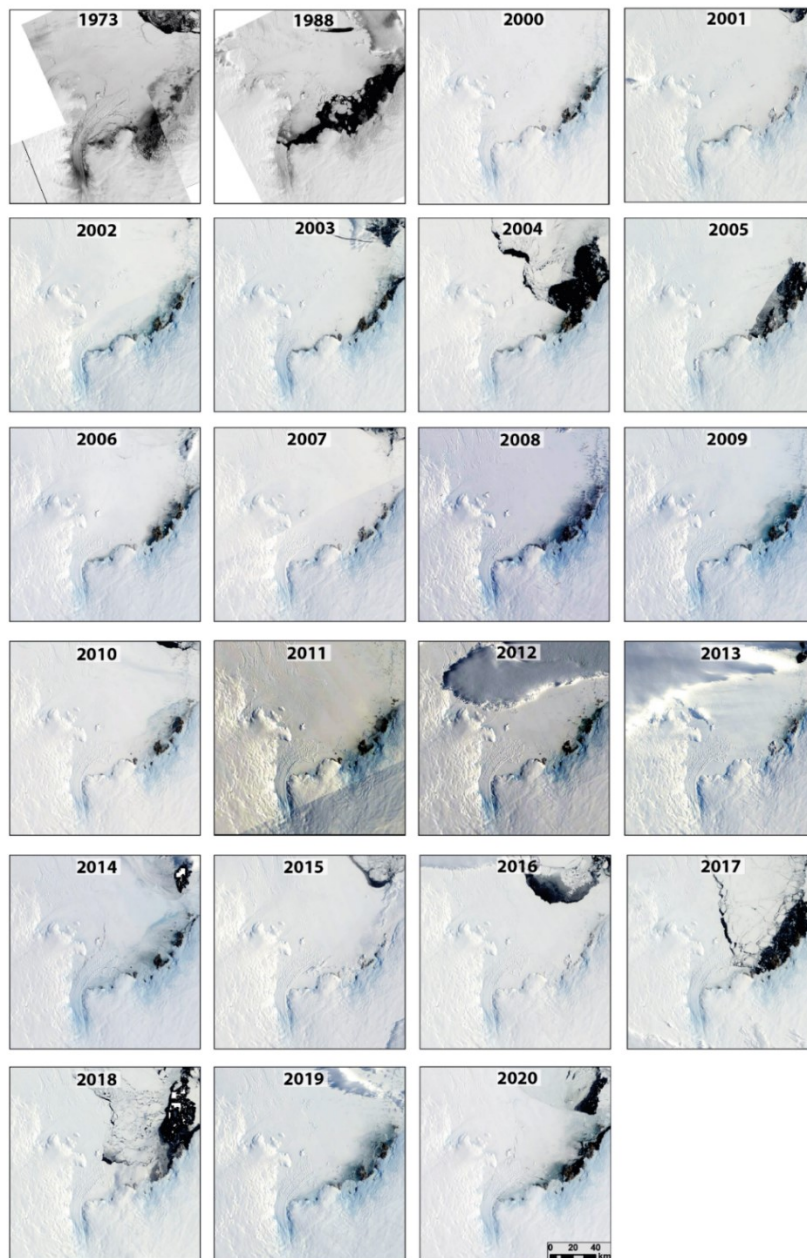

**Figure S1:** Landfast sea ice conditions in the Lützow-Holm Bay in all satellite imagery used in the study. The Landsat 1 and 4 images in 1973 and 1988 are taken in January and February respectively. The MODIS images between 2000 and 2020 all taken in March. Note the complete break-out of landfast sea-ice in 1988. MODIS imagery were obtained from NASA WorldView. Landsat images are courtesy of the U.S. Geological Survey.

**Animation S1:** This animation flicks between the Landsat-1 image pair used to extract ice speed from 1973/74. It shows a stable bedrock location in both images confirming the co-registration accuracy.

**Animation S2:** Same as Animation S1, except for the Landsat-4 image pair used to extract ice speed estimates from 1988

**Animation S3:** This animation flicks between the SPOT5 DEM from February 2008 and the REMA DEM from October 2015. Note the advance in the break-in-slope between 2008 and 2015. For reference we also include the MOA 2009 grounding line product as an approximation of the grounding line location.
