# Supplementary material for: Slowdown of Shirase Glacier, East Antarctica, caused by strengthening alongshore winds
Source: Copernicus journal article supplement (doi:10.5194/tc-17-445-2023), 2023-02-01
Supplement: Supplementary file [file tc-17-445-2023-supplement-title-page.pdf › tc-17-445-2023-supplement-title-page.pdf]

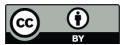

## *Supplement of*

# **Slowdown of Shirase Glacier, East Antarctica, caused by strengthening alongshore winds**

**Bertie W. J. Miles et al.**

*Correspondence to:* Bertie W. J. Miles ([bertie.miles@ed.ac.uk](mailto:bertie.miles@ed.ac.uk))

- [tc-17-445-2023-supplement-title-page.pdf](#)
- [supplement](#)
  - [Animation1.gif](#)
  - [Animation2.gif](#)
  - [AnimationS3.gif](#)
  - [SupplementaryInformation\\_TC\\_2.pdf](#)

The copyright of individual parts of the supplement might differ from the article licence.
